# Supplementary material
Source: Springer Nature journal article supplement (https://www.springermedizin.de/resource/supplementary/12913_2013_2996_MOESM2_ESM.pdf/9533246)

# Histogram

— Normal

Mean = 10,03  
Std. Dev. = 2,133  
N = 593

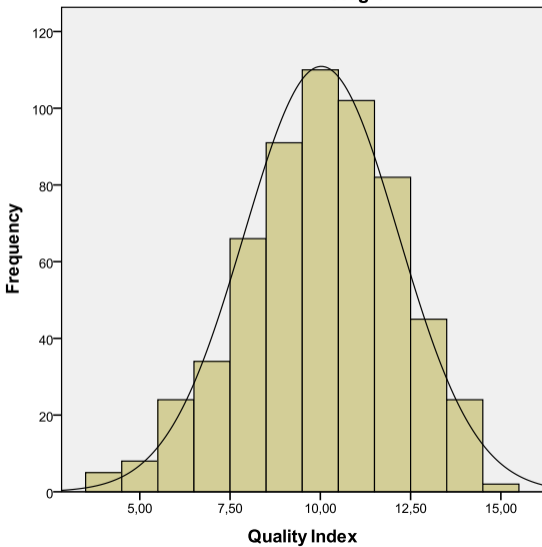

Supplement: MOESM2 [file 9533246]
